# Supplementary material for: Addition of Probiotics to Anti-Obesity Therapy by Percutaneous Electrical Stimulation of Dermatome T6. A Pilot Study
Source: MDPI journal article supplement (doi:10.3390/ijerph17197239), 2020-10-03
Supplement: s1 [file s1]

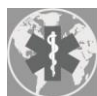

## Supplementary Materials: Addition of Probiotics to Anti-Obesity Therapy by Percutaneous Electrical Stimulation of Dermatome T6. A Pilot Study

| BACTERIA                    | N     | Media (NGC/g) | Median Percentile 50 (NGC/g) | Median Percentil 10 (NGC/g) | Median Percentil (NGC/g) | Median Percentile 75 (NGC/g) | Median Percentile 90 (NGC/g) | Reference Value(NGC/g) |
|-----------------------------|-------|---------------|------------------------------|-----------------------------|--------------------------|------------------------------|------------------------------|------------------------|
| Actinobacteria              | 1,533 | 7.54          | 8.05                         | 4.49                        | 6.56                     | 8.97                         | 9.66                         | 6.50-9.00              |
| Akkermansia muciniphila     | 1,546 | 5.48          | 6.30                         | 1.80                        | 3.20                     | 7.60                         | 8.20                         | 5.00-8.50              |
| Bacillus spp                | 487   | 2.59          | 2.70                         | 1.20                        | 2.20                     | 3.30                         | 3.70                         | 0.00-4.00              |
| Bacteroides spp             | 1,546 | 8.46          | 8.60                         | 7.50                        | 8.10                     | 9.00                         | 9.30                         | 7.00-8.50              |
| Bacteroidetes               | 1,546 | 8.76          | 8.83                         | 7.74                        | 8.29                     | 9.32                         | 9.65                         | 8.00-10.00             |
| Bifidobacterium spp         | 1,546 | 6.56          | 7.00                         | 3.90                        | 5.70                     | 7.80                         | 8.40                         | 5.00-7.00              |
| C. Coccoides                | 1,533 | 8.31          | 8.50                         | 7.40                        | 8.00                     | 8.90                         | 9.30                         | 7.00-9.00              |
| C. Perfringens              | 1,533 | 4.66          | 4.80                         | 3.35                        | 4.20                     | 5.30                         | 5.80                         | 0.00-5.50              |
| Campylobacter spp           | 1,533 | 0.79          | 0.00                         | 0.00                        | 0.00                     | 0.00                         | 4.30                         | 0.00-3.50              |
| E. Coli                     | 1,546 | 4.48          | 4.60                         | 2.00                        | 3.40                     | 5.70                         | 6.70                         | 4.00-6.50              |
| Enterobact. (exc. E.coli)   | 1,546 | 2.07          | 1.60                         | 0.60                        | 1.00                     | 2.60                         | 4.10                         | 0.00-2.50              |
| Enterococos spp             | 1,546 | 6.54          | 6.50                         | 5.30                        | 5.90                     | 7.20                         | 8.00                         | 6.00/8.50              |
| F. Prausnitzii              | 1,546 | 7.52          | 7.60                         | 6.30                        | 7.00                     | 8.10                         | 8.60                         | 6.50/8.00              |
| Firmicutes                  | 1,546 | 9.00          | 9.04                         | 8.25                        | 8.64                     | 9.40                         | 9.67                         | 8.50-10.00             |
| Helicobacter spp            | 1,533 | 1.32          | 0.00                         | 0.00                        | 0.00                     | 2.70                         | 3.40                         | 0.00-4.00              |
| Lactobacillus spp           | 1,541 | 5.02          | 4.90                         | 3.75                        | 4.30                     | 5.70                         | 6.40                         | 4.50-7.00              |
| Prevotella spp              | 1,546 | 6.55          | 6.20                         | 4.60                        | 5.20                     | 8.20                         | 9.00                         | 5.00-8.50              |
| Proteobacteria              | 1,533 | 5.6           | 5.68                         | 3.71                        | 4.72                     | 6.63                         | 7.42                         | 3.00-7.00              |
| Pseudomona spp              | 1,533 | 1.18          | 0.00                         | 0.00                        | 0.00                     | 2.20                         | 2.90                         | 0.00-4.00              |
| Saccaromyces cereviseae     | 1,533 | 3.22          | 3.30                         | 2.10                        | 2.70                     | 3.80                         | 2.40                         | 2.00-5.00              |
| Staphilococcus spp          | 1,533 | 3.02          | 3.00                         | 2.10                        | 2.50                     | 3.50                         | 4.00                         | 2.50-5.00              |
| Verucomicrobia              | 1,533 | 5.98          | 6.80                         | 1.94                        | 3.46                     | 8.21                         | 8.86                         | 5.50-9.00              |
| Muconutritive microbiota    | 1,533 | 8.03          | 8.10                         | 7.20                        | 7.70                     | 8.50                         | 8.80                         | 7.00-9.00              |
| Immunomodulatory microbiota | 1,533 | 7.53          | 7.60                         | 6.20                        | 6.90                     | 8.20                         | 8.70                         | 6.50-8.50              |
| Proteolitic microbiota      | 1,533 | 8.54          | 8.60                         | 7.70                        | 8.20                     | 9.00                         | 9.40                         | 6.50-9.00              |
| RATIOS                      |       |               |                              |                             |                          |                              |                              |                        |
| Firmicutes/Bacteroidetes    | 1,546 | 0.24          | 0.23                         | ~0.38                       | ~0.07                    | 0.53                         | 0.84                         | ~0.10/0.30             |
| Bacteroides/Prevotella      | 1,546 | 1.91          | 1.80                         | ~0.20                       | 0.40                     | 3.30                         | 4.00                         | 0.20/3.10              |
| C. Coccoides/C.perfringens  | 1,527 | 3.67          | 3.70                         | 2.60                        | 3.20                     | 4.30                         | 4.90                         | 1.50/5.50              |
| Enterobact./Enterococcus    | 1,546 | 0.01          | ~0.03                        | ~2.18                       | ~1.13                    | 1.05                         | 2.12                         | ~1.00/2.00             |
| Reoseburia spp/Eubacterium  | 1,533 | 7.23          | 7.30                         | 6.40                        | 6.90                     | 7.70                         | 8.00                         | 6.50/8.50              |

**Figure S1. Gut bacteria in control subjects.** Fecal samples from one hundred age- and sex-matched non-obese, normoglycemic and normolipidemic voluntaries without known cardiovascular, malignant and digestive diseases were analyzed to estimate the control ranges for each bacteria. NGC/g; number of gene copies per gram of feces.
